# Supplementary material
Source: publisher figshare collection journal article supplement (https://frontiersin.figshare.com/ndownloader/files/27645108)
Supplement: Supplementary file [file 27645108]

## Q1 Do you consent to participate in this study?

Answered: 879 Skipped: 0

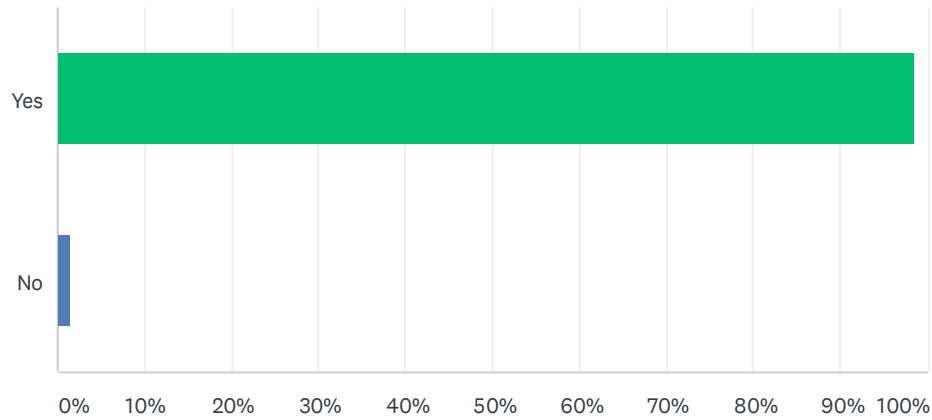

| ANSWER CHOICES |  | RESPONSES |     |
|----------------|--|-----------|-----|
| Yes (1)        |  | 98.63%    | 867 |
| No (2)         |  | 1.37%     | 12  |
| TOTAL          |  |           | 879 |

| BASIC STATISTICS |         |        |      |                    |
|------------------|---------|--------|------|--------------------|
| Minimum          | Maximum | Median | Mean | Standard Deviation |
| 1.00             | 2.00    | 1.00   | 1.01 | 0.12               |

## Q2 Farm type

Answered: 863 Skipped: 16

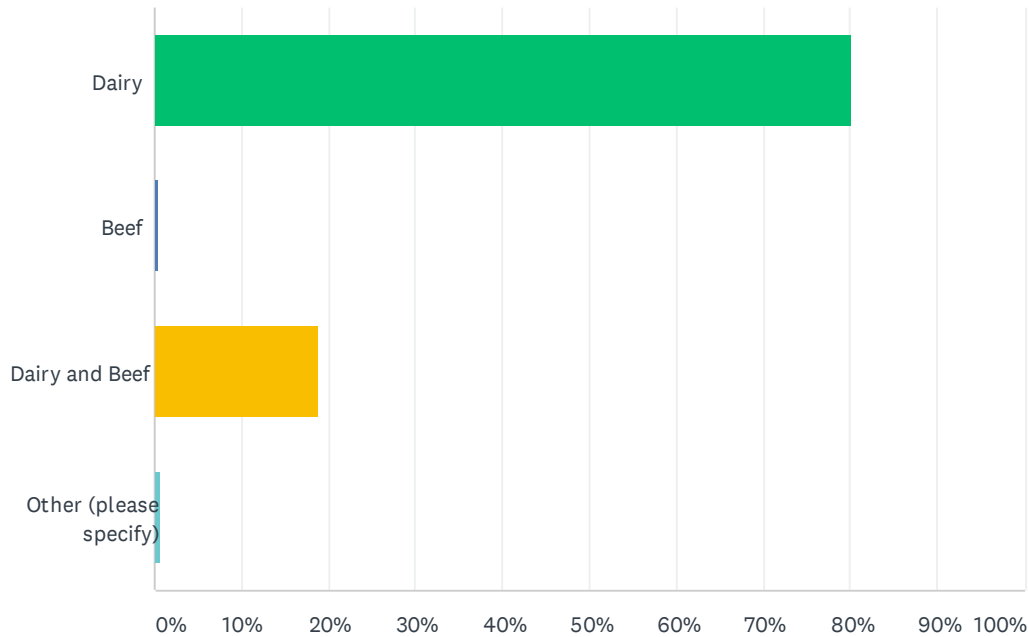

| ANSWER CHOICES         |  | RESPONSES |     |
|------------------------|--|-----------|-----|
| Dairy                  |  | 80.07%    | 691 |
| Beef                   |  | 0.46%     | 4   |
| Dairy and Beef         |  | 18.89%    | 163 |
| Other (please specify) |  | 0.58%     | 5   |
| TOTAL                  |  |           | 863 |

| BASIC STATISTICS |         |        |      |                    |
|------------------|---------|--------|------|--------------------|
| Minimum          | Maximum | Median | Mean | Standard Deviation |
| 3.00             | 6.00    | 3.00   | 3.40 | 0.81               |

## Q3 Age

Answered: 863    Skipped: 16

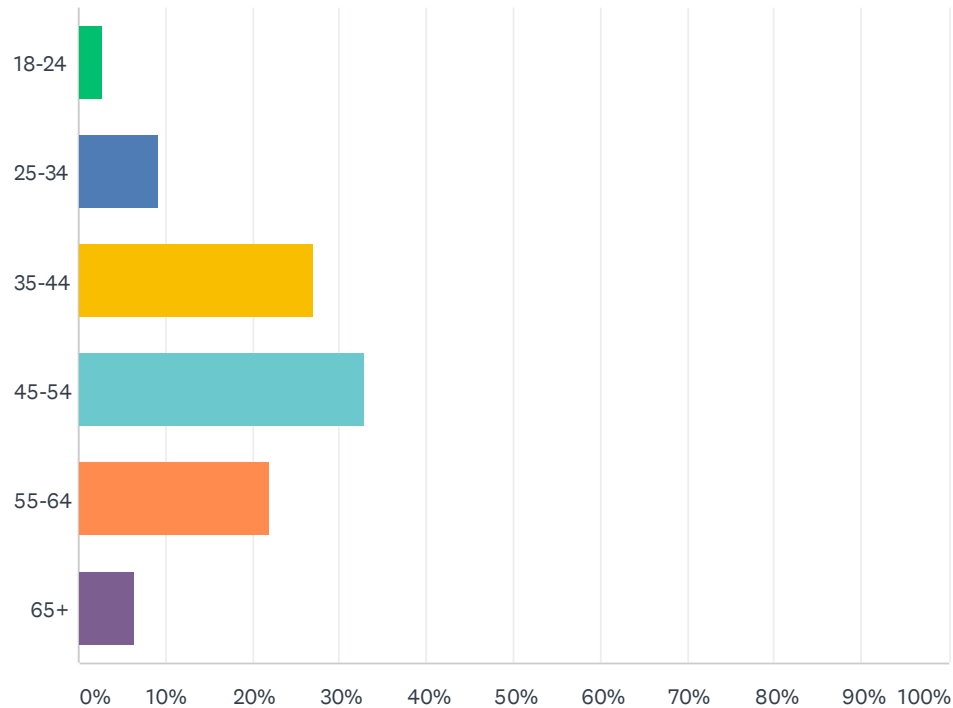

| ANSWER CHOICES | RESPONSES |     |
|----------------|-----------|-----|
| 18-24 (1)      | 2.67%     | 23  |
| 25-34 (2)      | 9.15%     | 79  |
| 35-44 (3)      | 27.00%    | 233 |
| 45-54 (4)      | 32.79%    | 283 |
| 55-64 (5)      | 21.90%    | 189 |
| 65+ (6)        | 6.49%     | 56  |
| TOTAL          |           | 863 |

| BASIC STATISTICS |                 |                |              |                            |
|------------------|-----------------|----------------|--------------|----------------------------|
| Minimum<br>1.00  | Maximum<br>6.00 | Median<br>4.00 | Mean<br>3.82 | Standard Deviation<br>1.15 |

## Q4 Which province do you live in?

Answered: 863 Skipped: 16

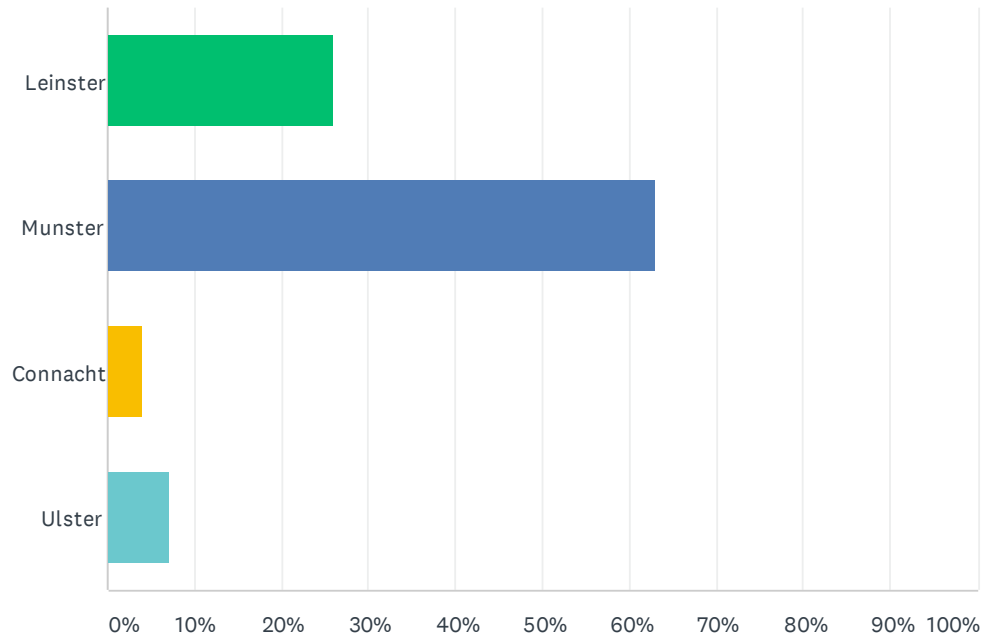

| ANSWER CHOICES |  | RESPONSES |     |
|----------------|--|-----------|-----|
| Leinster (1)   |  | 25.84%    | 223 |
| Munster (2)    |  | 63.04%    | 544 |
| Connacht (3)   |  | 4.06%     | 35  |
| Ulster (4)     |  | 7.07%     | 61  |
| TOTAL          |  |           | 863 |

| BASIC STATISTICS |         |        |      |                    |
|------------------|---------|--------|------|--------------------|
| Minimum          | Maximum | Median | Mean | Standard Deviation |
| 1.00             | 4.00    | 2.00   | 1.92 | 0.76               |

## Q5 Do you farm on a full time or part time basis?

Answered: 863 Skipped: 16

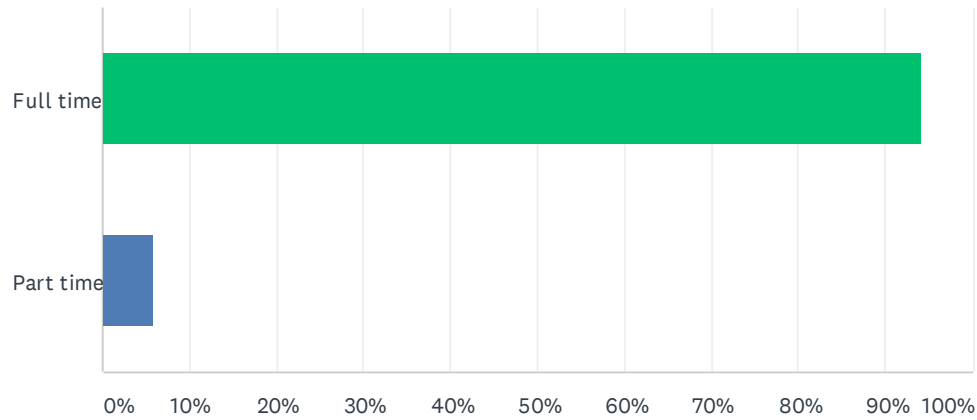

| ANSWER CHOICES |  | RESPONSES |     |
|----------------|--|-----------|-----|
| Full time (1)  |  | 94.09%    | 812 |
| Part time (2)  |  | 5.91%     | 51  |
| TOTAL          |  |           | 863 |

| BASIC STATISTICS |         |        |      |                    |
|------------------|---------|--------|------|--------------------|
| Minimum          | Maximum | Median | Mean | Standard Deviation |
| 1.00             | 2.00    | 1.00   | 1.06 | 0.24               |

Q6 Are you concerned by the increased number of male dairy calves in recent years?

Answered: 681    Skipped: 198

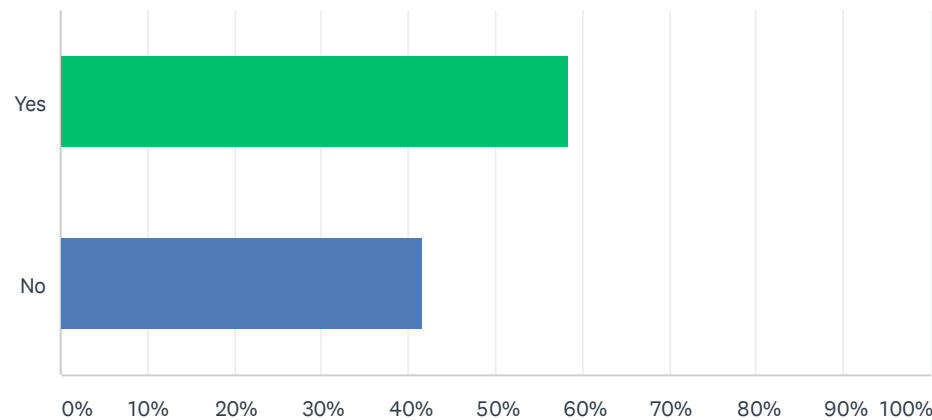

| ANSWER CHOICES |  | RESPONSES |     |
|----------------|--|-----------|-----|
| Yes (1)        |  | 58.30%    | 397 |
| No (2)         |  | 41.70%    | 284 |
| TOTAL          |  |           | 681 |

| BASIC STATISTICS |         |        |      |                    |
|------------------|---------|--------|------|--------------------|
| Minimum          | Maximum | Median | Mean | Standard Deviation |
| 1.00             | 2.00    | 1.00   | 1.42 | 0.49               |

Q7 Please rank the following potential drivers for the increased number of male dairy calves in recent years, with 1 being the main causal factor.

Answered: 681 Skipped: 198

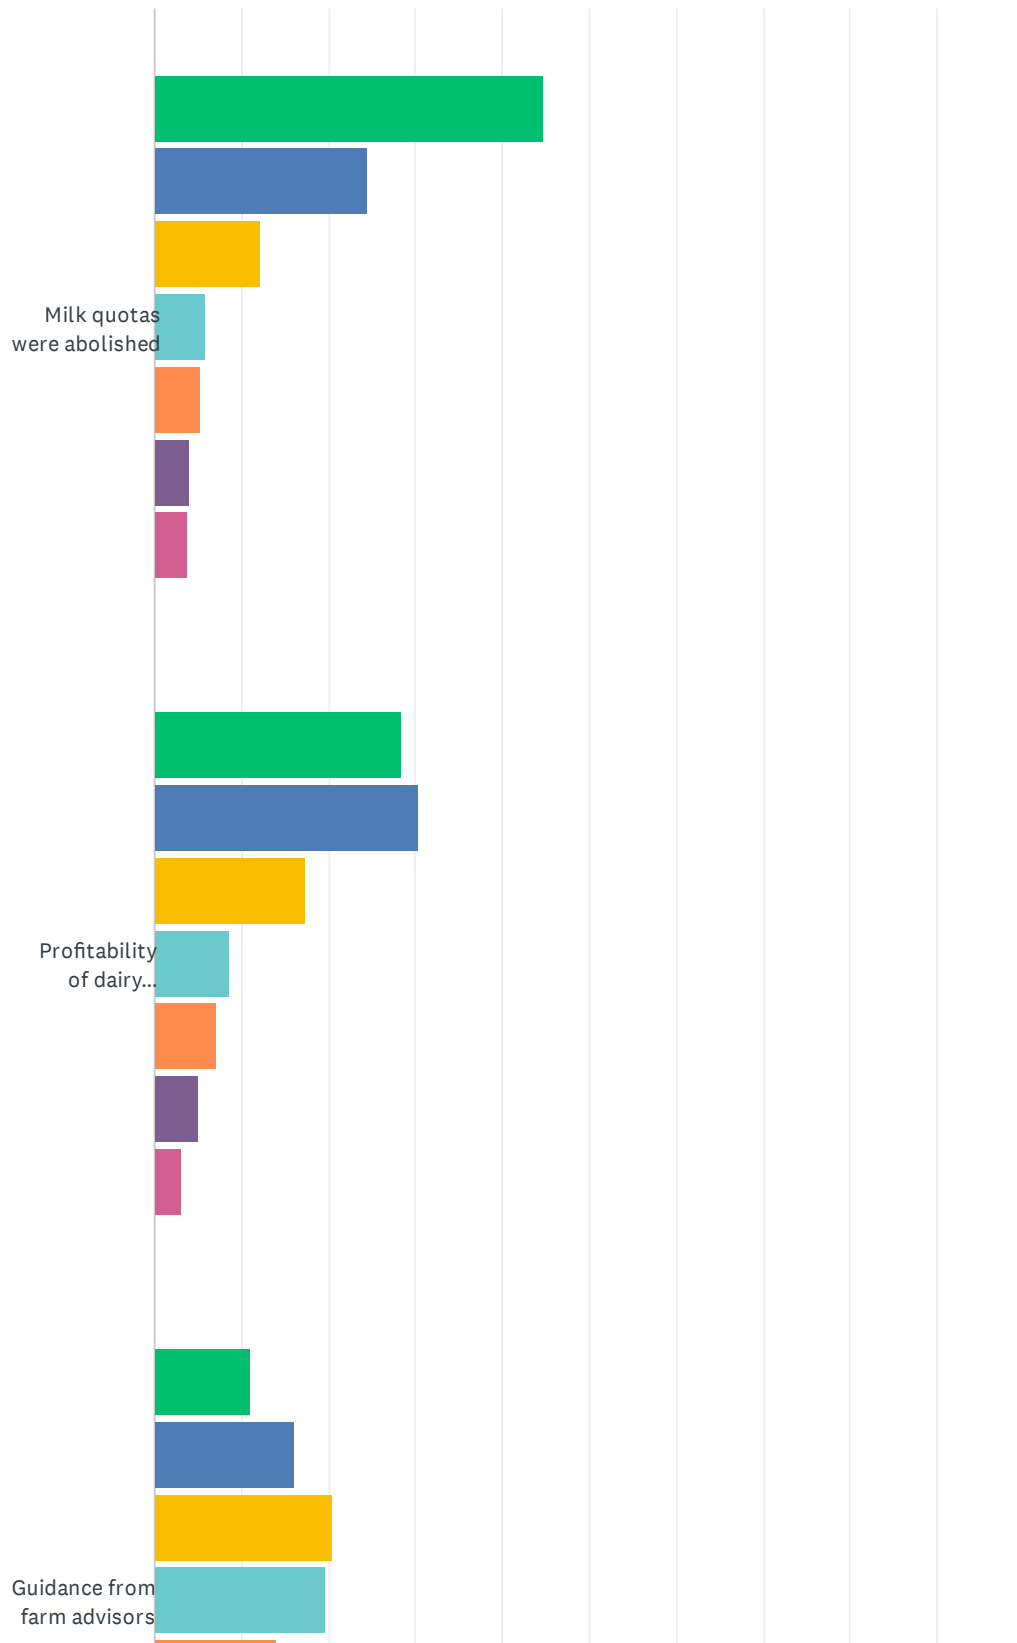

# DAFM Calf Welfare study

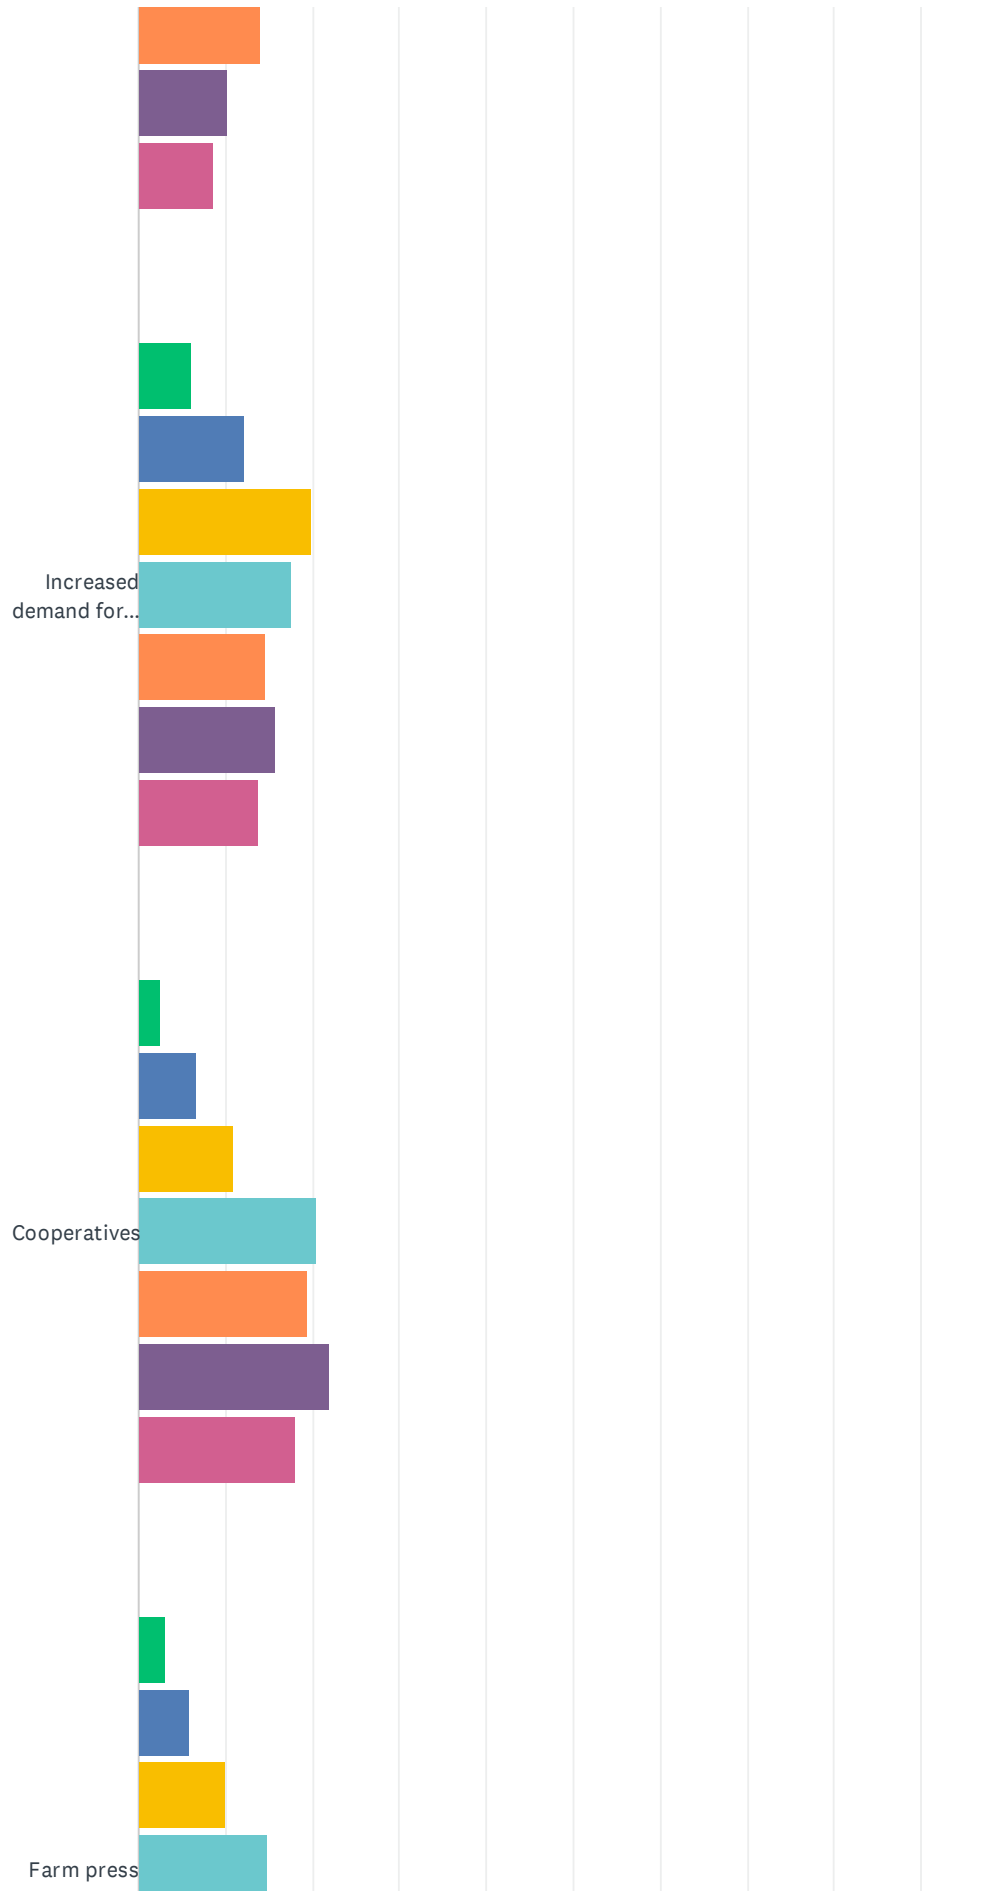



## DAFM Calf Welfare study

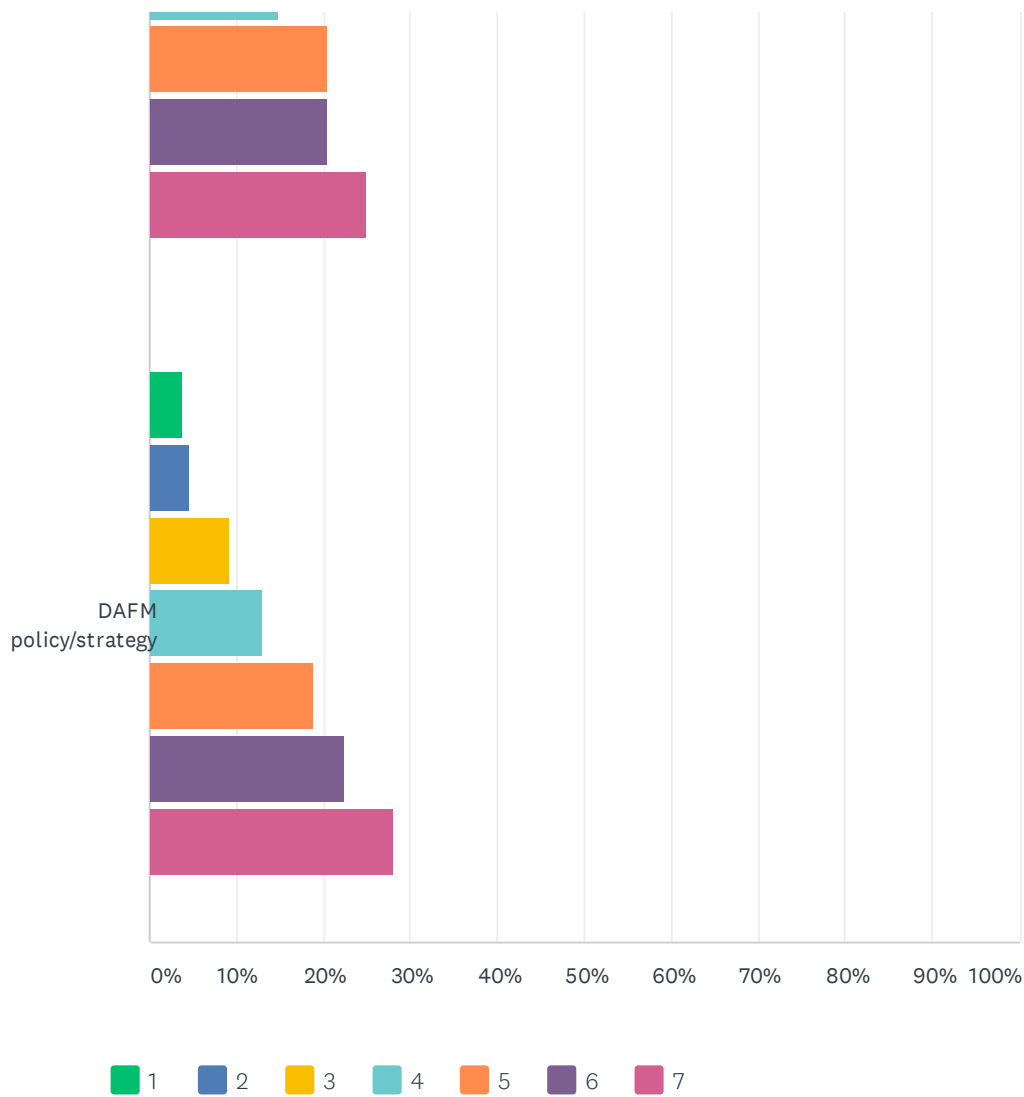

|                                                             | 1             | 2             | 3             | 4             | 5             | 6             | 7             | TOTAL | SCORE |
|-------------------------------------------------------------|---------------|---------------|---------------|---------------|---------------|---------------|---------------|-------|-------|
| Milk quotas were abolished                                  | 44.79%<br>305 | 24.38%<br>166 | 12.04%<br>82  | 5.87%<br>40   | 5.29%<br>36   | 3.96%<br>27   | 3.67%<br>25   | 681   | 5.71  |
| Profitability of dairy farming compared to other farm types | 28.49%<br>194 | 30.40%<br>207 | 17.33%<br>118 | 8.52%<br>58   | 7.20%<br>49   | 4.99%<br>34   | 3.08%<br>21   | 681   | 5.37  |
| Guidance from farm advisors                                 | 11.01%<br>75  | 16.01%<br>109 | 20.41%<br>139 | 19.68%<br>134 | 14.10%<br>96  | 10.28%<br>70  | 8.52%<br>58   | 681   | 4.25  |
| Increased demand for dairy products                         | 6.17%<br>42   | 12.04%<br>82  | 19.97%<br>136 | 17.62%<br>120 | 14.68%<br>100 | 15.71%<br>107 | 13.80%<br>94  | 681   | 3.75  |
| Cooperatives                                                | 2.50%<br>17   | 6.61%<br>45   | 10.87%<br>74  | 20.56%<br>140 | 19.38%<br>132 | 22.03%<br>150 | 18.06%<br>123 | 681   | 3.14  |
| Farm press                                                  | 3.23%<br>22   | 5.87%<br>40   | 10.13%<br>69  | 14.83%<br>101 | 20.56%<br>140 | 20.56%<br>140 | 24.82%<br>169 | 681   | 2.95  |
| DAFM policy/strategy                                        | 3.82%<br>26   | 4.70%<br>32   | 9.25%<br>63   | 12.92%<br>88  | 18.80%<br>128 | 22.47%<br>153 | 28.05%<br>191 | 681   | 2.82  |

## DAFM Calf Welfare study

| BASIC STATISTICS                                            |         |         |        |      |                    |
|-------------------------------------------------------------|---------|---------|--------|------|--------------------|
|                                                             | MINIMUM | MAXIMUM | MEDIAN | MEAN | STANDARD DEVIATION |
| Milk quotas were abolished                                  | 1.00    | 7.00    | 2.00   | 2.29 | 1.66               |
| DAFM policy/strategy                                        | 1.00    | 7.00    | 6.00   | 5.18 | 1.69               |
| Profitability of dairy farming compared to other farm types | 1.00    | 7.00    | 2.00   | 2.63 | 1.62               |
| Increased demand for dairy products                         | 1.00    | 7.00    | 4.00   | 4.25 | 1.79               |
| Guidance from farm advisors                                 | 1.00    | 7.00    | 4.00   | 3.75 | 1.76               |
| Farm press                                                  | 1.00    | 7.00    | 5.00   | 5.05 | 1.67               |
| Cooperatives                                                | 1.00    | 7.00    | 5.00   | 4.86 | 1.60               |

Q8 Please rank the following possible options in order of how effective you think they would be in managing the number of male dairy calves, with 1 being the most effective.

Answered: 681 Skipped: 198

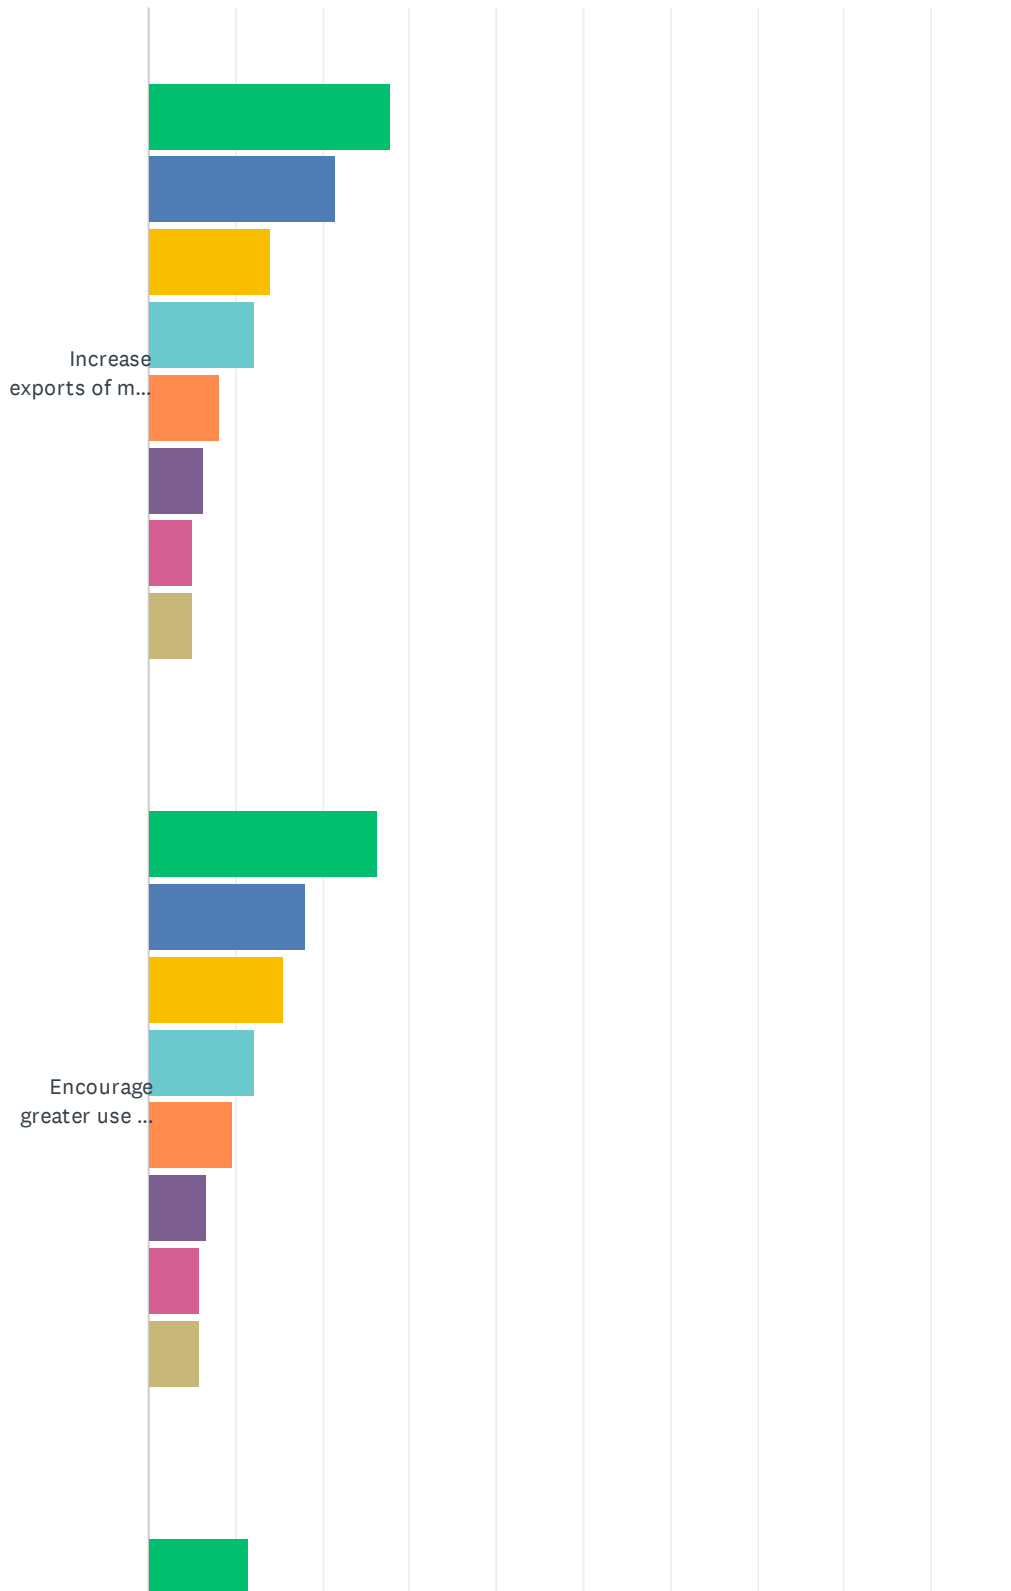

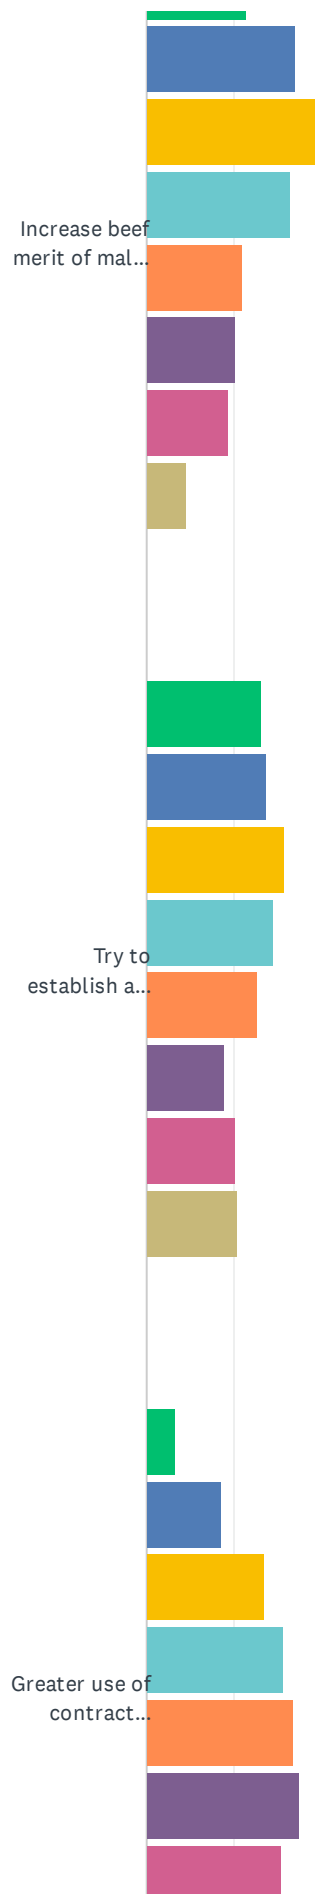

# DAFM Calf Welfare study

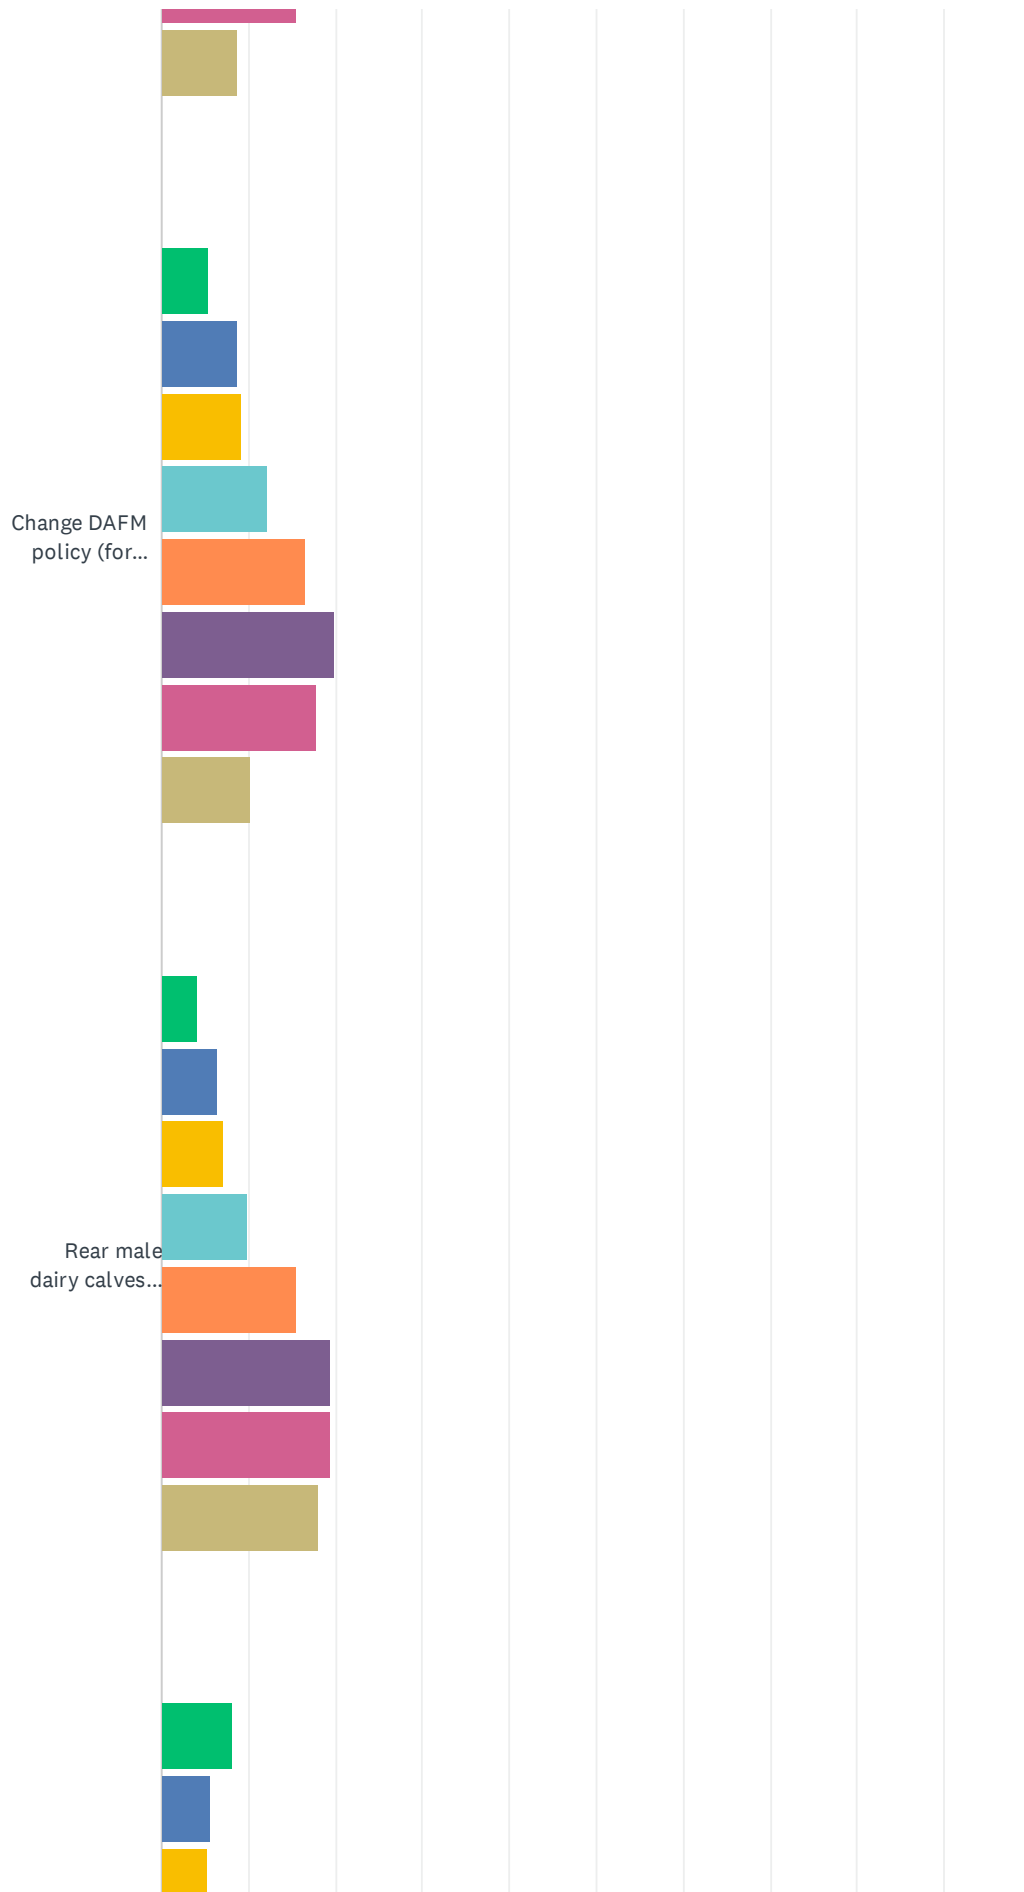

# DAFM Calf Welfare study

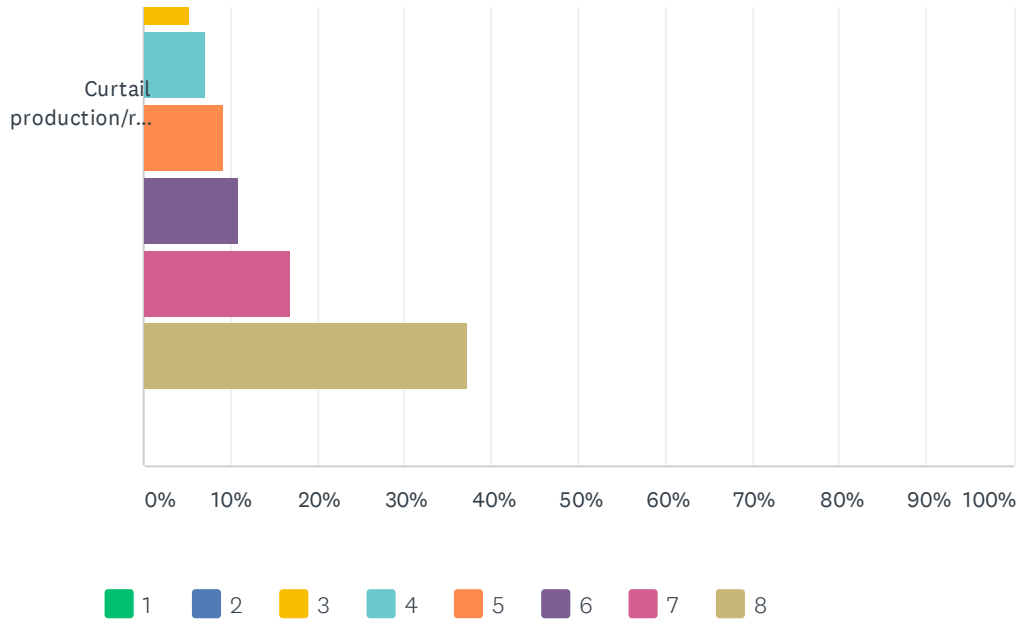

|                                                                         | 1             | 2             | 3             | 4             | 5             | 6             | 7             | 8             | TOTAL | SCORE |
|-------------------------------------------------------------------------|---------------|---------------|---------------|---------------|---------------|---------------|---------------|---------------|-------|-------|
| Increase exports of male dairy calves                                   | 27.75%<br>189 | 21.59%<br>147 | 14.10%<br>96  | 12.04%<br>82  | 8.22%<br>56   | 6.31%<br>43   | 4.99%<br>34   | 4.99%<br>34   | 681   | 5.85  |
| Encourage greater use of sexed semen                                    | 26.43%<br>180 | 17.91%<br>122 | 15.42%<br>105 | 12.04%<br>82  | 9.69%<br>66   | 6.75%<br>46   | 5.87%<br>40   | 5.87%<br>40   | 681   | 5.66  |
| Increase beef merit of male dairy calves                                | 11.45%<br>78  | 17.18%<br>117 | 19.53%<br>133 | 16.45%<br>112 | 11.16%<br>76  | 10.28%<br>70  | 9.40%<br>64   | 4.55%<br>31   | 681   | 5.10  |
| Try to establish a veal industry in Ireland                             | 13.22%<br>90  | 13.80%<br>94  | 15.86%<br>108 | 14.68%<br>100 | 12.78%<br>87  | 8.96%<br>61   | 10.28%<br>70  | 10.43%<br>71  | 681   | 4.80  |
| Greater use of contract rearing for male dairy calves                   | 3.38%<br>23   | 8.66%<br>59   | 13.51%<br>92  | 15.71%<br>107 | 17.03%<br>116 | 17.47%<br>119 | 15.42%<br>105 | 8.81%<br>60   | 681   | 4.07  |
| Change DAFM policy (for example, encourage farm types other than dairy) | 5.43%<br>37   | 8.81%<br>60   | 9.10%<br>62   | 12.19%<br>83  | 16.59%<br>113 | 19.82%<br>135 | 17.77%<br>121 | 10.28%<br>70  | 681   | 3.92  |
| Rear male dairy calves for beef production on own farm                  | 4.26%<br>29   | 6.46%<br>44   | 7.20%<br>49   | 9.84%<br>67   | 15.42%<br>105 | 19.53%<br>133 | 19.38%<br>132 | 17.91%<br>122 | 681   | 3.49  |
| Curtail production/re-introduce quotas                                  | 8.08%<br>55   | 5.58%<br>38   | 5.29%<br>36   | 7.05%<br>48   | 9.10%<br>62   | 10.87%<br>74  | 16.89%<br>115 | 37.15%<br>253 | 681   | 3.11  |

# DAFM Calf Welfare study

| BASIC STATISTICS                                                        |         |         |        |      |                    |
|-------------------------------------------------------------------------|---------|---------|--------|------|--------------------|
|                                                                         | MINIMUM | MAXIMUM | MEDIAN | MEAN | STANDARD DEVIATION |
| Curtail production/re-introduce quotas                                  | 1.00    | 8.00    | 7.00   | 5.89 | 2.32               |
| Change DAFM policy (for example, encourage farm types other than dairy) | 1.00    | 8.00    | 5.00   | 5.08 | 1.99               |
| Increase beef merit of male dairy calves                                | 1.00    | 8.00    | 4.00   | 3.90 | 2.00               |
| Increase exports of male dairy calves                                   | 1.00    | 8.00    | 3.00   | 3.15 | 2.09               |
| Try to establish a veal industry in Ireland                             | 1.00    | 8.00    | 4.00   | 4.20 | 2.22               |
| Encourage greater use of sexed semen                                    | 1.00    | 8.00    | 3.00   | 3.34 | 2.16               |
| Rear male dairy calves for beef production on own farm                  | 1.00    | 8.00    | 6.00   | 5.51 | 1.99               |
| Greater use of contract rearing for male dairy calves                   | 1.00    | 8.00    | 5.00   | 4.93 | 1.90               |

Q9 If live exports were to cease, please rank the following possible options in order of how effective you think they would be in managing the number of male dairy calves, with 1 being the most effective.

Answered: 681 Skipped: 198

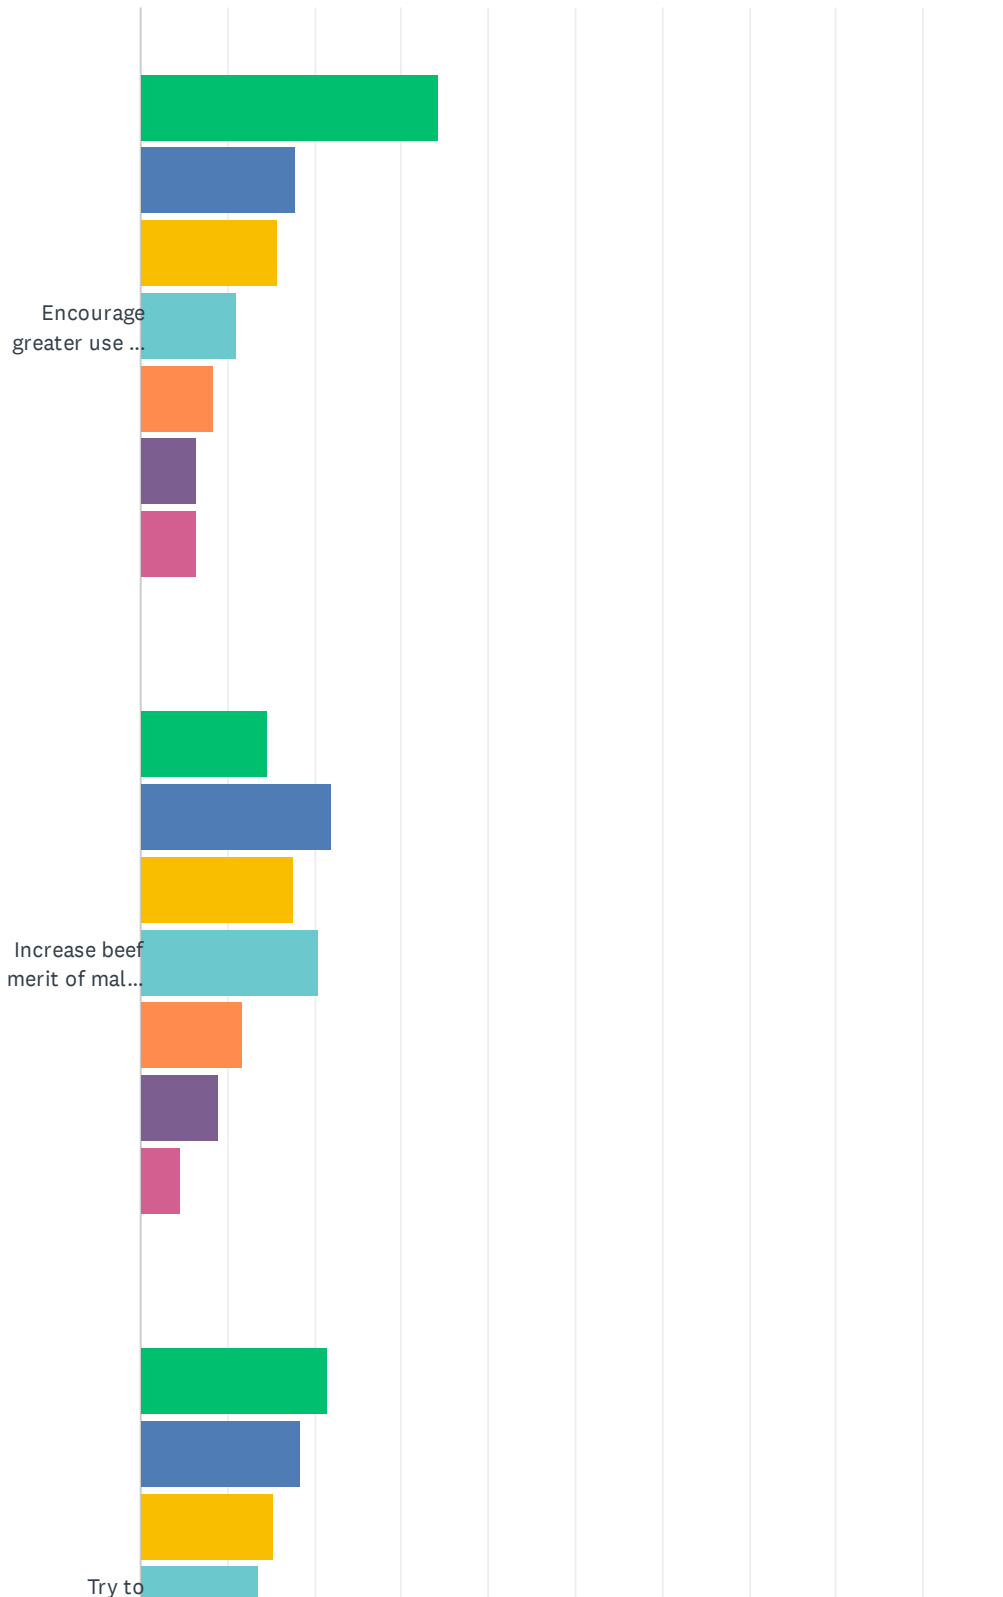



# DAFM Calf Welfare study

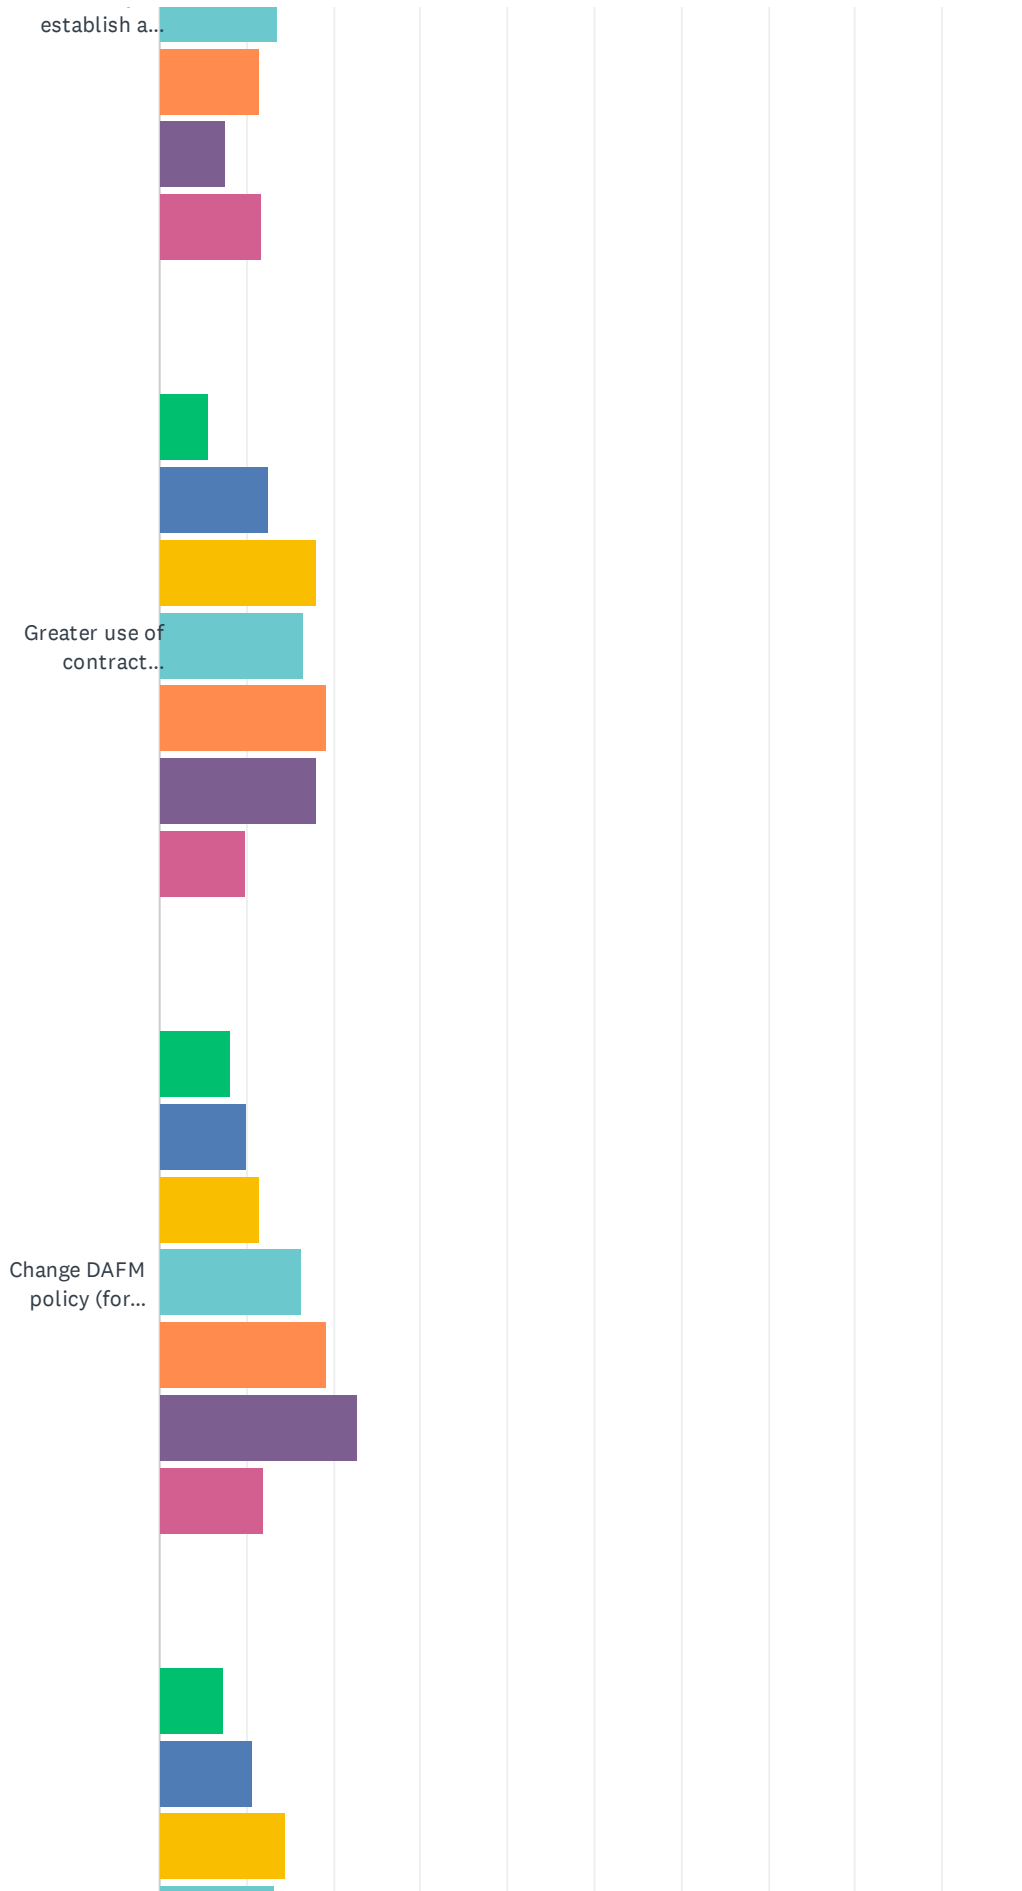

## DAFM Calf Welfare study

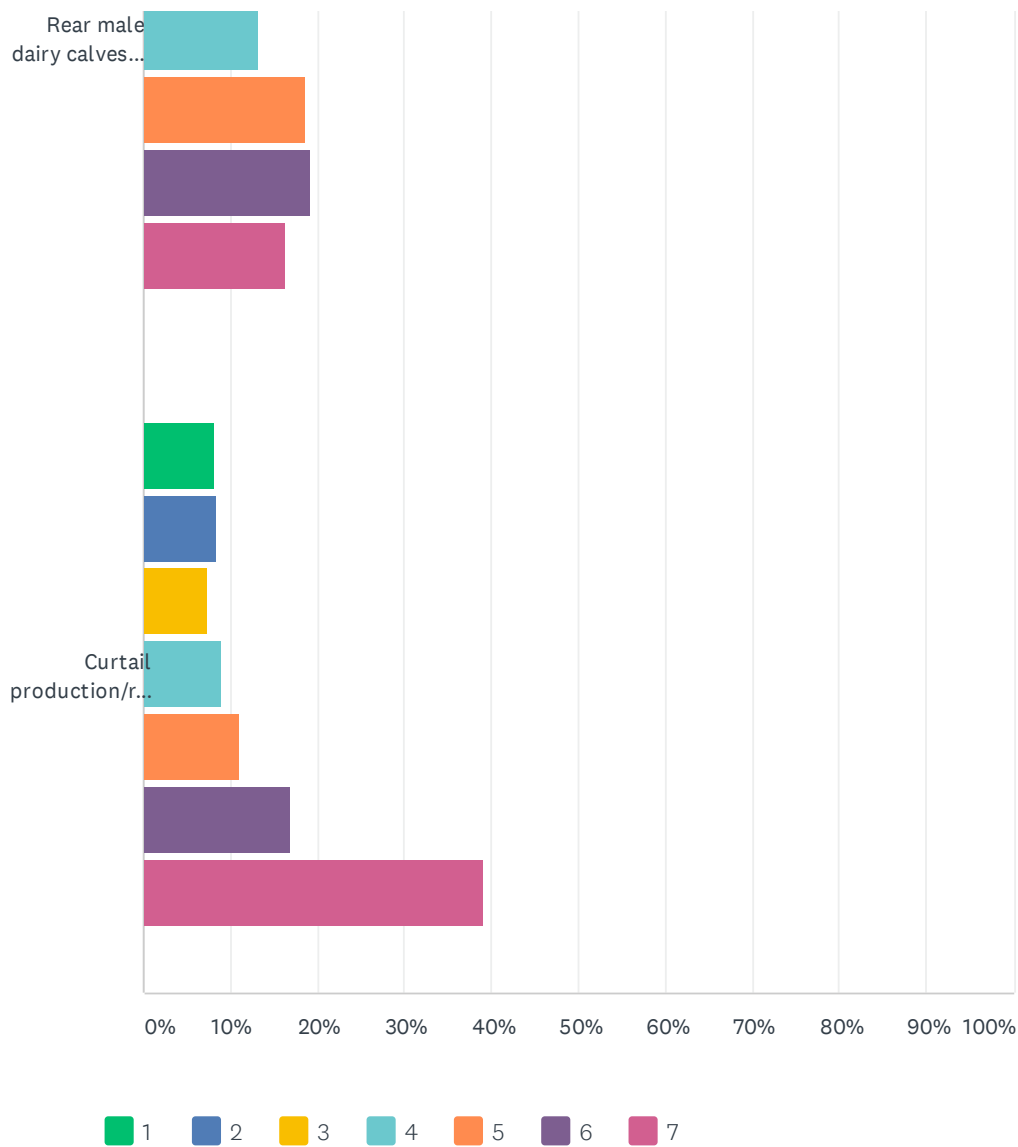

|                                                                         | 1             | 2             | 3             | 4             | 5             | 6             | 7             | TOTAL | SCORE |
|-------------------------------------------------------------------------|---------------|---------------|---------------|---------------|---------------|---------------|---------------|-------|-------|
| Encourage greater use of sexed semen                                    | 34.21%<br>233 | 17.77%<br>121 | 15.71%<br>107 | 11.01%<br>75  | 8.37%<br>57   | 6.46%<br>44   | 6.46%<br>44   | 681   | 5.13  |
| Increase beef merit of male dairy calves                                | 14.68%<br>100 | 21.88%<br>149 | 17.62%<br>120 | 20.41%<br>139 | 11.75%<br>80  | 8.96%<br>61   | 4.70%<br>32   | 681   | 4.62  |
| Try to establish a veal industry in Ireland                             | 21.59%<br>147 | 18.50%<br>126 | 15.27%<br>104 | 13.66%<br>93  | 11.60%<br>79  | 7.64%<br>52   | 11.75%<br>80  | 681   | 4.55  |
| Greater use of contract rearing for male dairy calves                   | 5.73%<br>39   | 12.63%<br>86  | 18.06%<br>123 | 16.45%<br>112 | 19.24%<br>131 | 18.06%<br>123 | 9.84%<br>67   | 681   | 3.76  |
| Change DAFM policy (for example, encourage farm types other than dairy) | 8.22%<br>56   | 10.13%<br>69  | 11.45%<br>78  | 16.30%<br>111 | 19.24%<br>131 | 22.76%<br>155 | 11.89%<br>81  | 681   | 3.56  |
| Rear male dairy calves for beef production on own farm                  | 7.34%<br>50   | 10.72%<br>73  | 14.54%<br>99  | 13.22%<br>90  | 18.65%<br>127 | 19.24%<br>131 | 16.30%<br>111 | 681   | 3.52  |
| Curtail production/re-introduce quotas                                  | 8.22%<br>56   | 8.37%<br>57   | 7.34%<br>50   | 8.96%<br>61   | 11.16%<br>76  | 16.89%<br>115 | 39.06%<br>266 | 681   | 2.87  |

# DAFM Calf Welfare study

| BASIC STATISTICS                                                        |         |         |        |      |                    |
|-------------------------------------------------------------------------|---------|---------|--------|------|--------------------|
|                                                                         | MINIMUM | MAXIMUM | MEDIAN | MEAN | STANDARD DEVIATION |
| Rear male dairy calves for beef production on own farm                  | 1.00    | 7.00    | 5.00   | 4.48 | 1.85               |
| Try to establish a veal industry in Ireland                             | 1.00    | 7.00    | 3.00   | 3.45 | 2.00               |
| Encourage greater use of sexed semen                                    | 1.00    | 7.00    | 2.00   | 2.87 | 1.89               |
| Increase beef merit of male dairy calves                                | 1.00    | 7.00    | 3.00   | 3.38 | 1.70               |
| Greater use of contract rearing for male dairy calves                   | 1.00    | 7.00    | 4.00   | 4.24 | 1.72               |
| Curtail production/re-introduce quotas                                  | 1.00    | 7.00    | 6.00   | 5.13 | 2.04               |
| Change DAFM policy (for example, encourage farm types other than dairy) | 1.00    | 7.00    | 5.00   | 4.44 | 1.80               |

## Q10 Please select all stakeholders who you think are responsible for making changes to the number of male dairy calves.

Answered: 681 Skipped: 198

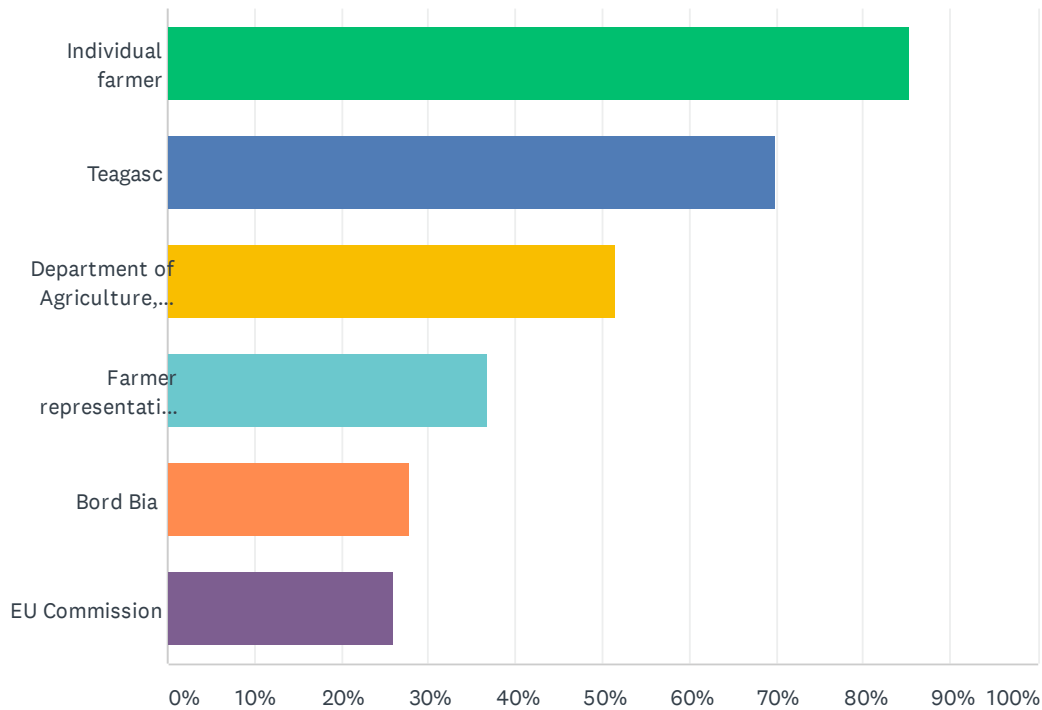

| ANSWER CHOICES                                     |  | RESPONSES |     |
|----------------------------------------------------|--|-----------|-----|
| Individual farmer (1)                              |  | 85.32%    | 581 |
| Teagasc (3)                                        |  | 69.90%    | 476 |
| Department of Agriculture, Food and the Marine (2) |  | 51.40%    | 350 |
| Farmer representative organisations (6)            |  | 36.86%    | 251 |
| Bord Bia (4)                                       |  | 27.75%    | 189 |
| EU Commission (5)                                  |  | 25.99%    | 177 |
| Total Respondents: 681                             |  |           |     |

| BASIC STATISTICS |         |        |      |                    |
|------------------|---------|--------|------|--------------------|
| Minimum          | Maximum | Median | Mean | Standard Deviation |
| 1.00             | 6.00    | 3.00   | 2.89 | 1.69               |

## Q11 How many hours do you typically work on a spring day?

Answered: 681    Skipped: 198

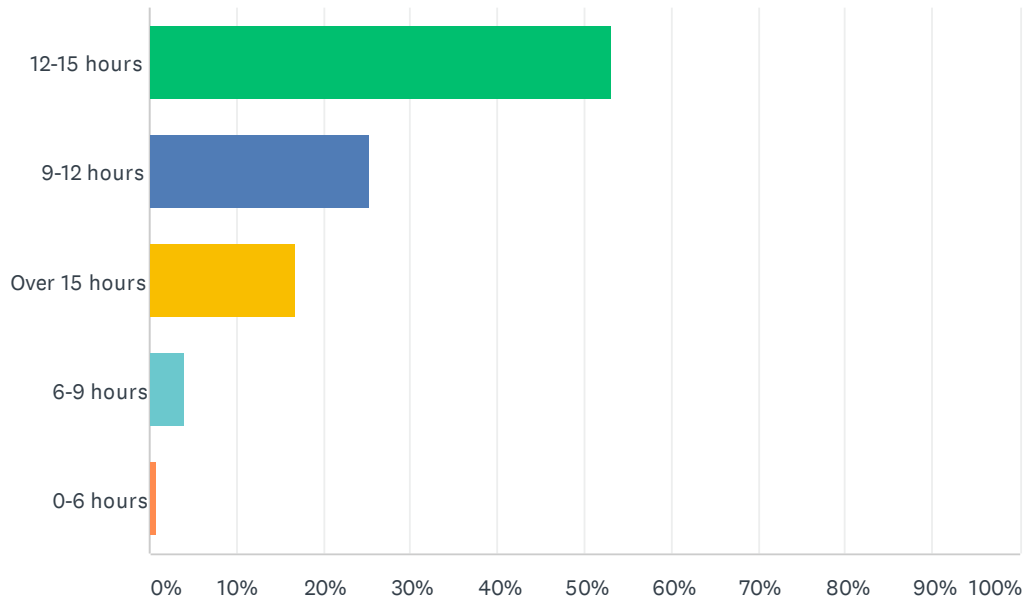

| ANSWER CHOICES    |  | RESPONSES |     |
|-------------------|--|-----------|-----|
| 12-15 hours (4)   |  | 53.16%    | 362 |
| 9-12 hours (3)    |  | 25.26%    | 172 |
| Over 15 hours (5) |  | 16.74%    | 114 |
| 6-9 hours (2)     |  | 3.96%     | 27  |
| 0-6 hours (1)     |  | 0.88%     | 6   |
| TOTAL             |  |           | 681 |

| BASIC STATISTICS |                 |                |              |                            |
|------------------|-----------------|----------------|--------------|----------------------------|
| Minimum<br>1.00  | Maximum<br>5.00 | Median<br>4.00 | Mean<br>3.81 | Standard Deviation<br>0.79 |

## Q12 What kind of assistance do you have on your farm? Please select all that apply.

Answered: 681 Skipped: 198

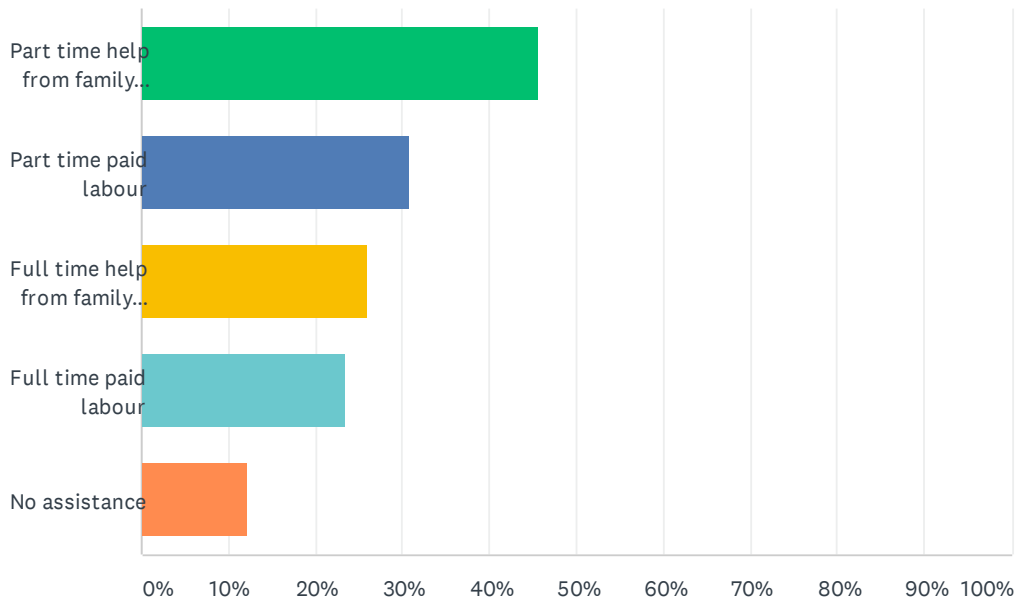

| ANSWER CHOICES                           |  | RESPONSES |     |
|------------------------------------------|--|-----------|-----|
| Part time help from family member(s) (2) |  | 45.52%    | 310 |
| Part time paid labour (4)                |  | 30.69%    | 209 |
| Full time help from family member(s) (1) |  | 25.99%    | 177 |
| Full time paid labour (3)                |  | 23.49%    | 160 |
| No assistance (5)                        |  | 12.19%    | 83  |
| Total Respondents: 681                   |  |           |     |

| BASIC STATISTICS |         |        |      |                    |
|------------------|---------|--------|------|--------------------|
| Minimum          | Maximum | Median | Mean | Standard Deviation |
| 1.00             | 5.00    | 2.00   | 2.69 | 1.25               |

## Q13 How many dairy cows do you have on your farm?

Answered: 681    Skipped: 198

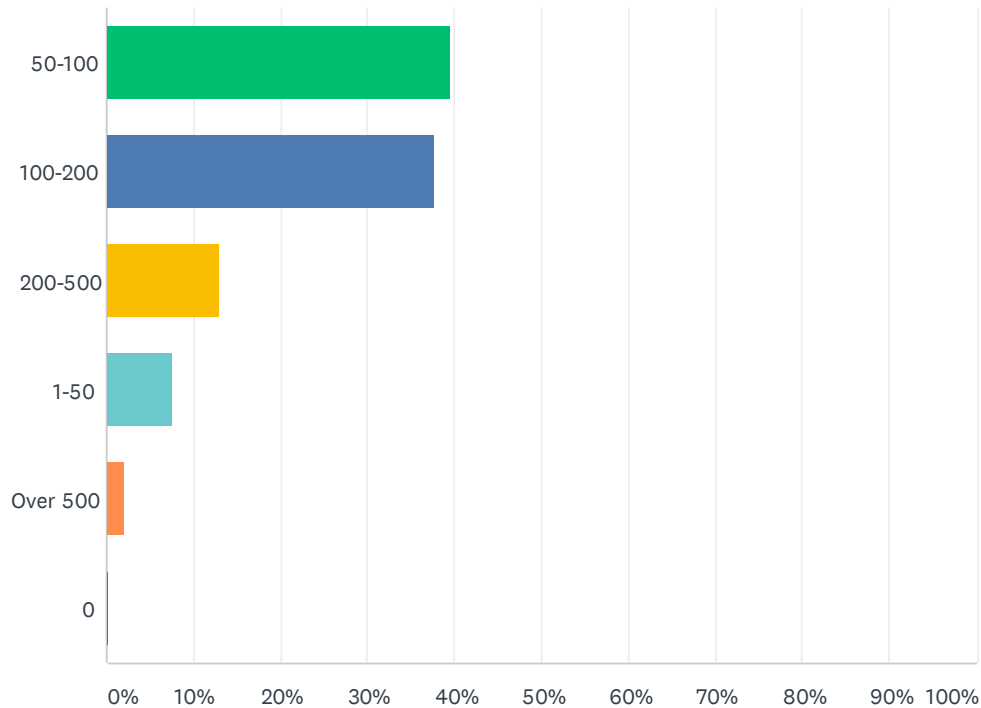

| ANSWER CHOICES |  | RESPONSES  |
|----------------|--|------------|
| 50-100 (3)     |  | 39.50% 269 |
| 100-200 (4)    |  | 37.59% 256 |
| 200-500 (5)    |  | 12.92% 88  |
| 1-50 (2)       |  | 7.64% 52   |
| Over 500 (6)   |  | 2.06% 14   |
| 0 (1)          |  | 0.29% 2    |
| TOTAL          |  | 681        |

| BASIC STATISTICS |         |        |      |                    |
|------------------|---------|--------|------|--------------------|
| Minimum          | Maximum | Median | Mean | Standard Deviation |
| 1.00             | 6.00    | 4.00   | 3.61 | 0.89               |

Q14 What do you consider the main role of your male dairy calves to be?

Answered: 672    Skipped: 207

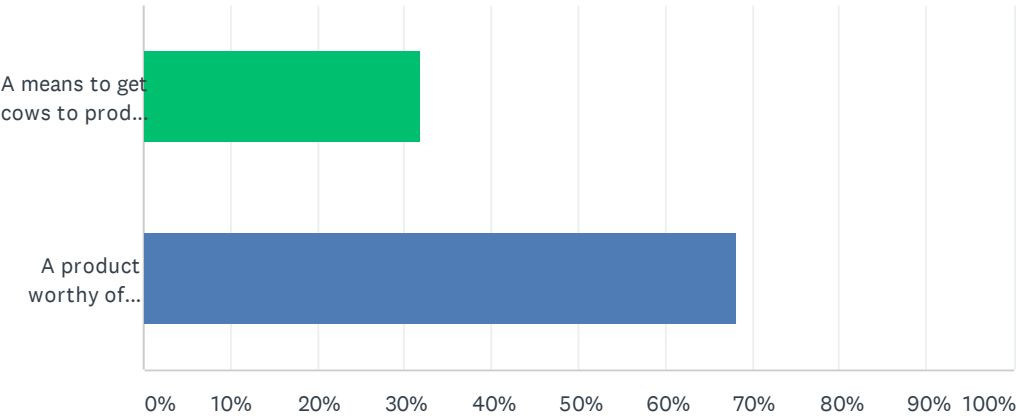

| ANSWER CHOICES                                   |  | RESPONSES  |
|--------------------------------------------------|--|------------|
| A means to get cows to produce milk (1)          |  | 31.85% 214 |
| A product worthy of selling in its own right (2) |  | 68.15% 458 |
| TOTAL                                            |  | 672        |

| BASIC STATISTICS |         |        |      |                    |
|------------------|---------|--------|------|--------------------|
| Minimum          | Maximum | Median | Mean | Standard Deviation |
| 1.00             | 2.00    | 2.00   | 1.68 | 0.47               |



## Q15 What breed(s) are your dairy cows? Please select all that apply.

Answered: 672 Skipped: 207

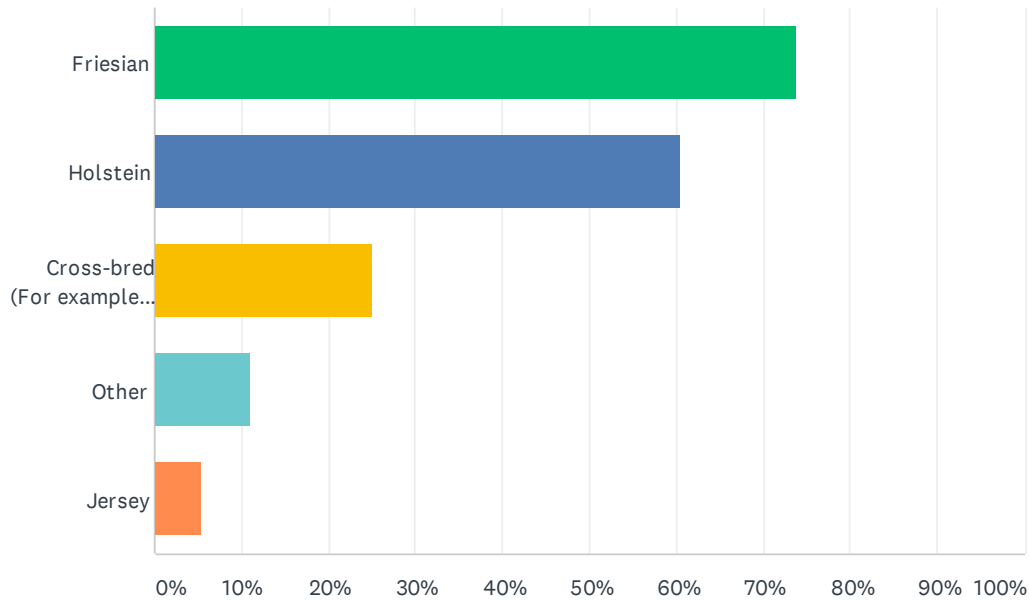

| ANSWER CHOICES                                     |  | RESPONSES |     |
|----------------------------------------------------|--|-----------|-----|
| Friesian (1)                                       |  | 73.81%    | 496 |
| Holstein (2)                                       |  | 60.42%    | 406 |
| Cross-bred (For example Jersey-Friesian cross) (4) |  | 25.15%    | 169 |
| Other (5)                                          |  | 11.16%    | 75  |
| Jersey (3)                                         |  | 5.36%     | 36  |
| Total Respondents: 672                             |  |           |     |

| BASIC STATISTICS |                 |                |              |                            |
|------------------|-----------------|----------------|--------------|----------------------------|
| Minimum<br>1.00  | Maximum<br>5.00 | Median<br>2.00 | Mean<br>2.09 | Standard Deviation<br>1.26 |

## Q16 How do you currently manage your male dairy calf stock? Please select all apply.

Answered: 672 Skipped: 207

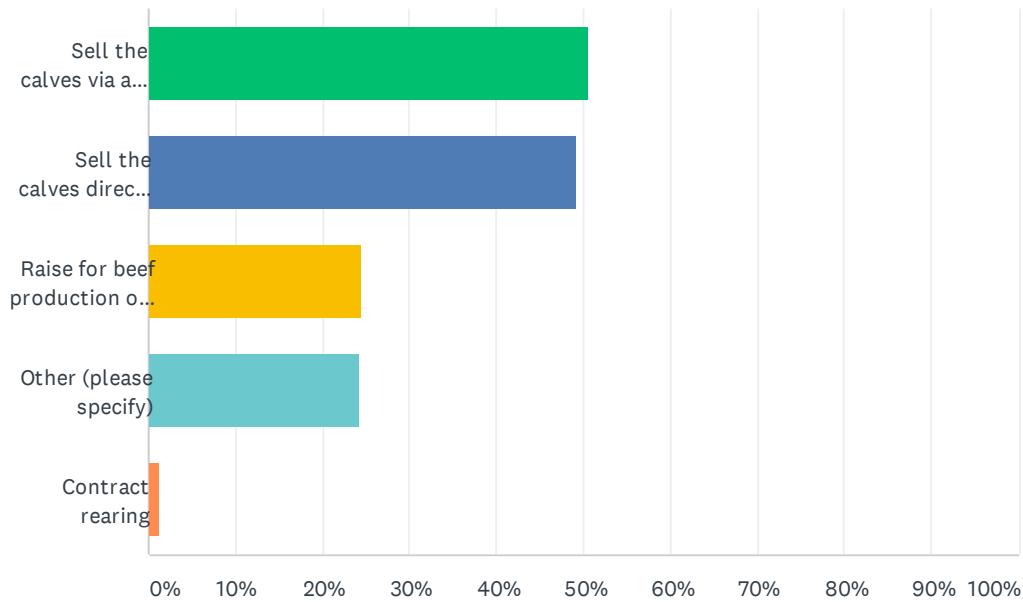

| ANSWER CHOICES                                  |  | RESPONSES |     |
|-------------------------------------------------|--|-----------|-----|
| Sell the calves via a mart (3)                  |  | 50.60%    | 340 |
| Sell the calves direct to a dealer/exporter (4) |  | 49.11%    | 330 |
| Raise for beef production on your farm (1)      |  | 24.40%    | 164 |
| Other (please specify) (5)                      |  | 24.26%    | 163 |
| Contract rearing (2)                            |  | 1.34%     | 9   |
| Total Respondents: 672                          |  |           |     |

| BASIC STATISTICS |         |        |      |                    |
|------------------|---------|--------|------|--------------------|
| Minimum          | Maximum | Median | Mean | Standard Deviation |
| 1.00             | 5.00    | 3.00   | 3.32 | 1.24               |

## Q17 Have you enough calf accommodation on your farm?

Answered: 672 Skipped: 207

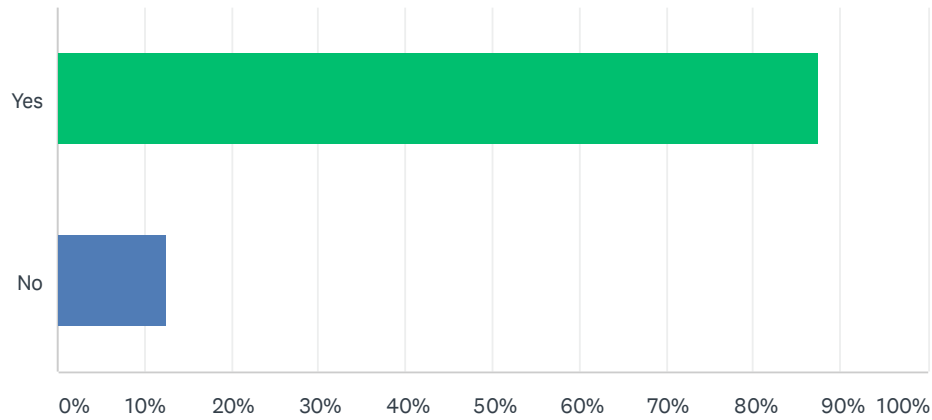

| ANSWER CHOICES |  | RESPONSES |     |
|----------------|--|-----------|-----|
| Yes (1)        |  | 87.50%    | 588 |
| No (2)         |  | 12.50%    | 84  |
| TOTAL          |  |           | 672 |

| BASIC STATISTICS |         |        |      |                    |
|------------------|---------|--------|------|--------------------|
| Minimum          | Maximum | Median | Mean | Standard Deviation |
| 1.00             | 2.00    | 1.00   | 1.13 | 0.33               |

## Q18 To what extent do you agree with this statement - 'I am willing to pay for contract rearing for my male dairy calves'

Answered: 672 Skipped: 207

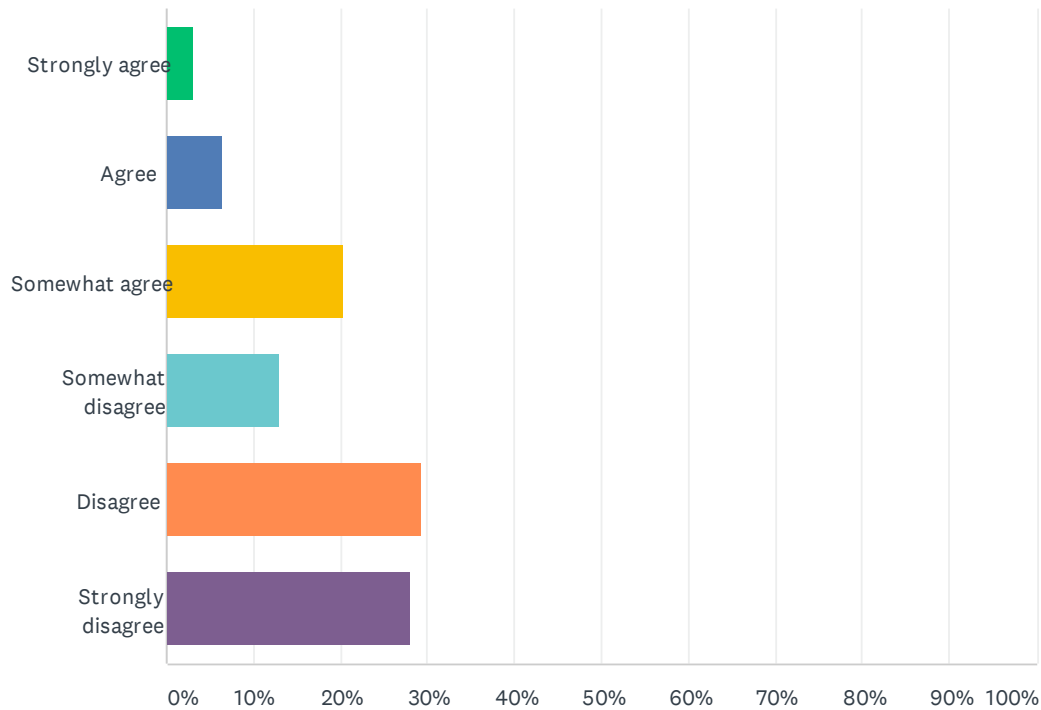

| ANSWER CHOICES        |  | RESPONSES |     |
|-----------------------|--|-----------|-----|
| Strongly agree (1)    |  | 3.13%     | 21  |
| Agree (2)             |  | 6.40%     | 43  |
| Somewhat agree (3)    |  | 20.24%    | 136 |
| Somewhat disagree (4) |  | 12.95%    | 87  |
| Disagree (5)          |  | 29.32%    | 197 |
| Strongly disagree (6) |  | 27.98%    | 188 |
| TOTAL                 |  |           | 672 |

| BASIC STATISTICS |         |        |      |                    |
|------------------|---------|--------|------|--------------------|
| Minimum          | Maximum | Median | Mean | Standard Deviation |
| 1.00             | 6.00    | 5.00   | 4.43 | 1.40               |

Q19 Please provide any additional comments or suggestions you may have in the box below.

Answered: 402   Skipped: 477
